# Supplementary material
Source: PubMed Central journal article supplement (PMC4199892)

# SUPPLEMENTARY FIGURE 1

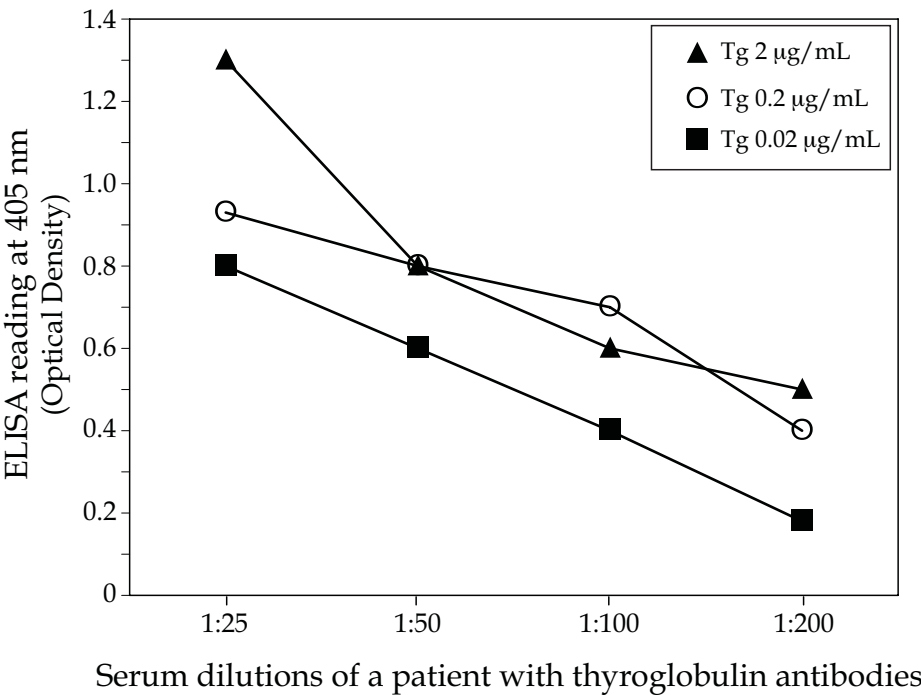

# SUPPLEMENTARY FIGURE 2

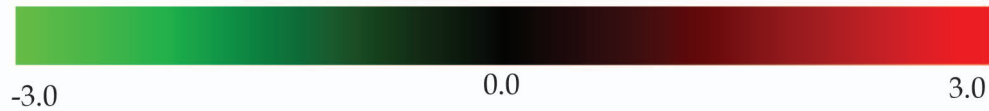

TWO/007  
 FJA/009  
 GKO/010  
 TKE/002  
 SDA/004  
 JSE/017  
 RFR/020  
 GVE/005  
 AGE/021  
 AME/019  
 JGE/014  
 CHO/022  
 CLE/018  
 JKN/023  
 AES/025  
 WOU/026  
 HVI/011  
 HTO/027  
 JHI/008  
 AVO/006  
 BAN/003  
 GST/013  
 GBO/015  
 ABO/16  
 IBO/028

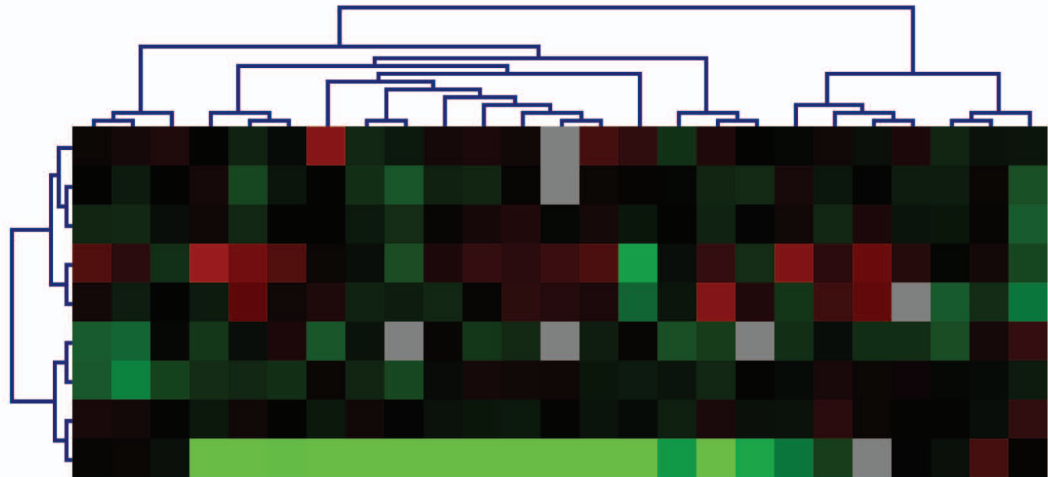

CD4/CD25<sup>int</sup>/FoxP3 increase  
 T<sub>reg</sub> pre-treatment  
 CD4 T<sub>eff</sub>/T<sub>em</sub> pre-treatment  
 CD4/CTLA-4 pre-treatment  
 CD4/PD1 pre-treatment  
 T<sub>reg</sub> increase  
 CD8 T<sub>eff</sub>/T<sub>em</sub>/T<sub>cm</sub> pre-treatment  
 CD4 T<sub>eff</sub>/T<sub>em</sub> increase  
 TgAbs

# SUPPLEMENTARY FIGURE 3

|   |    |    |   |   |  |   |    |    |   |   |
|---|----|----|---|---|--|---|----|----|---|---|
| ▲ | N= | 10 | 4 | 4 |  | 4 | 7  | 8  | 7 | 3 |
| □ | N= | 11 | 2 | 7 |  |   | 10 | 12 | 8 | 2 |
| ● | N= | 5  |   |   |  | 3 | 6  | 6  | 3 |   |

Thyroglobulin Antibodies  
(mean  $\pm$  SE)

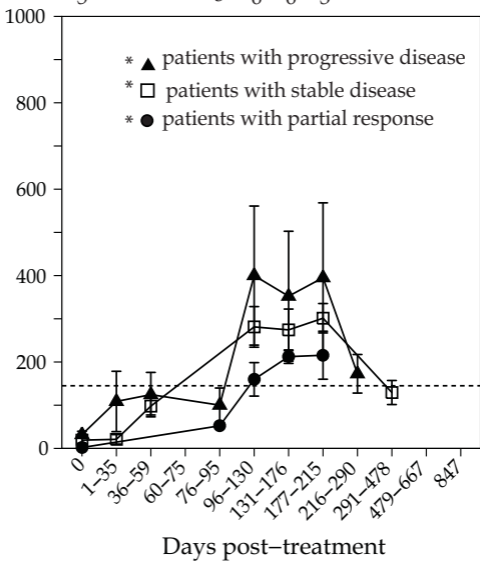

# SUPPLEMENTARY FIGURE 4

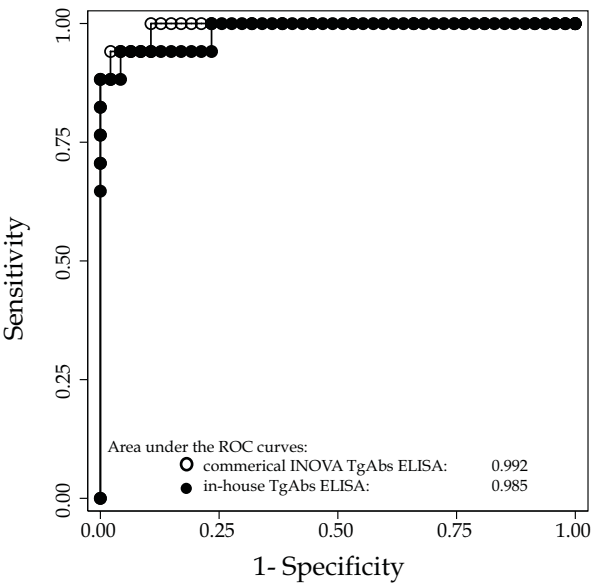

# SUPPLEMENTARY FIGURE 5

TgAbs by in-house ELISA

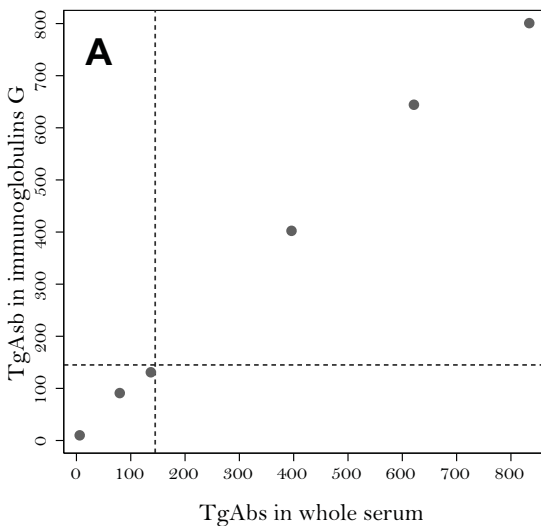

TgAbs by commercial ELISA

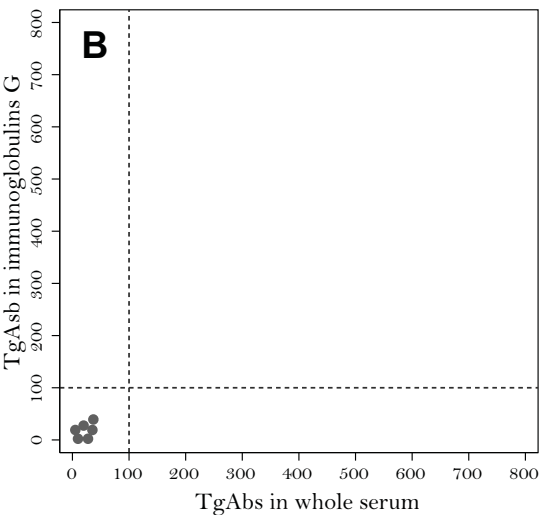

# SUPPLEMENTARY FIGURE 6

**A**

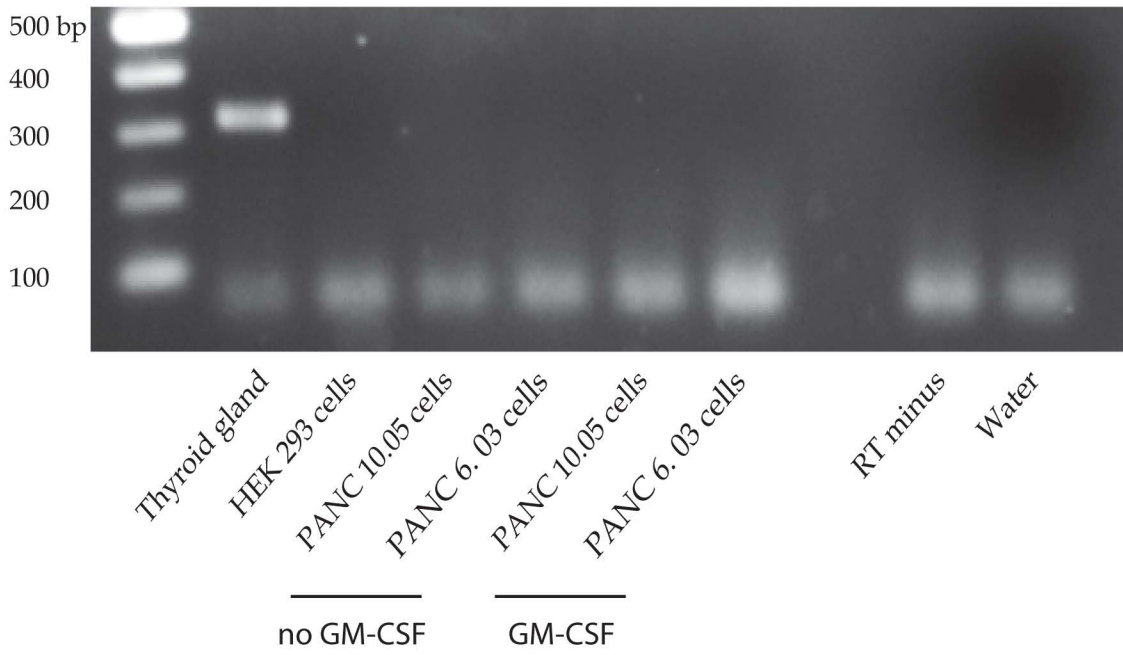

**B**

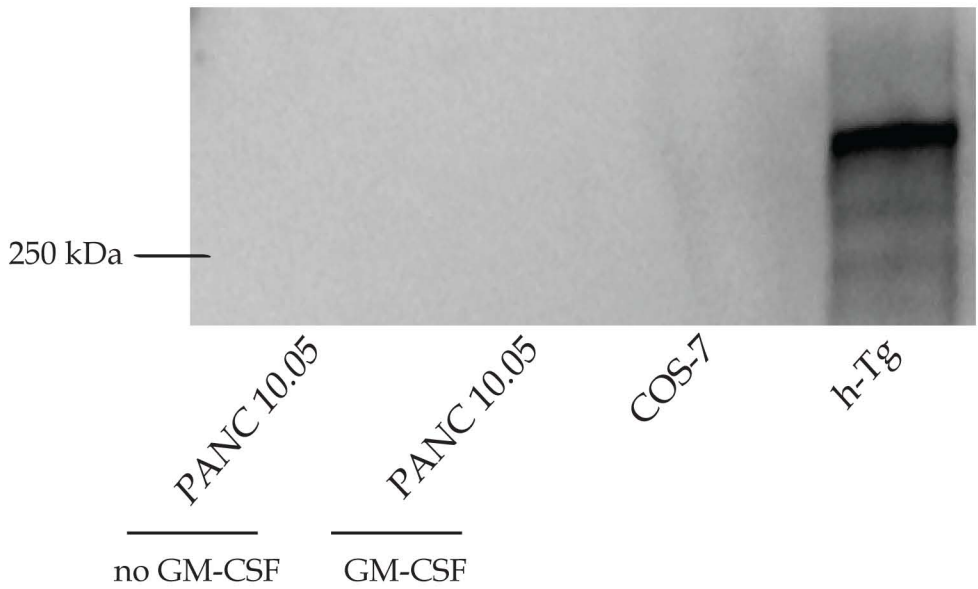

Supplement: NIHMS596021-supplement-Supp_FigureS1-S6.pdf [file NIHMS596021-supplement-Supp_FigureS1-S6.pdf]
